# Supplementary material for: Integrative analyses reveal biological function and prognostic role of m7G methylation regulators in high-grade glioma
Source: Aging (Albany NY). 2023 Sep 6;15(17):8782–99. doi: 10.18632/aging.204999 (PMC10522370; doi:10.18632/aging.204999)
Supplement: Supplementary Table 3 [file aging-15-204999-s002.xlsx]

## Sheet: Supplementary Table 3
Supplementary Table 3. Differentially expressed genes from CGGA based on risk score.
gene	lowMean	highMean	logFC	pValue	fdr
ABCC3	1.64414	3.3763	1.03811	3.68249e-33	5.14391e-32
AC062021.1	1.98279	0.549984	-1.85007	5.86787e-26	4.14367e-25
AC064875.2	0.621608	1.68789	1.44114	3.03058e-34	4.78466e-33
AC112229.7	1.48727	0.602752	-1.30303	2.29022e-12	5.7479e-12
ADAM12	0.90741	2.19851	1.2767	1.44461e-47	1.40318e-45
ARSJ	0.809022	1.69227	1.06471	1.64173e-27	1.34596e-26
ASPM	0.764524	1.7152	1.16574	3.72165e-41	1.44406e-39
ATP2B3	1.43191	0.584861	-1.29177	6.09398e-25	3.87599e-24
C15orf48	0.628978	1.59437	1.34191	6.86838e-32	8.52993e-31
C6orf141	0.90247	1.96394	1.1218	1.29165e-17	4.71496e-17
CA3	1.17303	2.49672	1.08979	9.5983e-35	1.61074e-33
CABP4	0.687674	1.48052	1.10631	5.61468e-42	2.54168e-40
CACNG2	1.50502	0.49561	-1.60251	7.52595e-32	9.29934e-31
CACNG3	1.57105	0.447211	-1.8127	5.66409e-25	3.61511e-24
CAMK1G	1.62509	0.812078	-1.00083	2.81751e-11	6.56881e-11
CBLN2	1.83017	0.692931	-1.4012	4.31424e-29	4.10357e-28
CCR5	0.666409	1.38009	1.05028	6.46559e-37	1.39048e-35
CDCA2	0.673708	1.41605	1.07167	8.42901e-39	2.29792e-37
CDH18	1.91586	0.797805	-1.26389	5.43631e-33	7.50089e-32
CDH22	2.53352	1.18088	-1.10128	1.01497e-38	2.75677e-37
CELSR1	0.785947	1.66669	1.08448	6.58646e-35	1.12638e-33
CEP55	0.82043	1.83979	1.16508	1.65533e-49	2.38027e-47
CHGA	4.81681	2.39017	-1.01096	2.26537e-41	9.10307e-40
CHRM1	2.41889	0.848546	-1.51128	1.74182e-41	7.21676e-40
CHRNA9	0.477533	1.57981	1.72607	2.28927e-32	2.99525e-31
CKAP2L	0.849555	1.71538	1.01375	1.98715e-37	4.5398e-36
CKMT1A	2.93831	1.28119	-1.1975	3.88185e-34	6.05048e-33
CKMT1B	3.21733	1.54243	-1.06066	5.32993e-34	8.14314e-33
CLCF1	0.922099	2.20749	1.25941	2.59746e-44	1.56306e-42
CLEC2L	2.3046	1.0014	-1.2025	2.52562e-20	1.12628e-19
CLEC5A	0.683309	1.83187	1.4227	1.14336e-33	1.68539e-32
CLSPN	0.726668	1.54036	1.0839	6.13487e-39	1.71065e-37
COL6A3	1.05452	2.40959	1.1922	1.01164e-31	1.23545e-30
COL8A1	0.901136	2.19543	1.28469	1.22687e-34	2.02185e-33
CPLX2	4.93867	2.45983	-1.00557	1.27122e-38	3.40858e-37
CSTA	1.01283	2.20931	1.12521	2.23688e-37	5.05522e-36
CTD-2339F6.1	1.90807	0.804755	-1.24549	1.32396e-09	2.77209e-09
CTD-2380F24.1	1.58227	0.649149	-1.28537	1.15884e-29	1.16897e-28
CTD-3049M7.1	1.26115	2.57874	1.03193	1.88298e-27	1.53432e-26
CUX2	1.51774	0.592086	-1.35805	6.80653e-30	7.0008e-29
CXCL10	1.1112	2.28912	1.04267	1.73803e-31	2.07081e-30
CXXC11	3.3412	1.50368	-1.15187	1.97625e-35	3.56966e-34
CYP17A1-AS1	1.97874	0.919591	-1.10552	5.35013e-27	4.18062e-26
CYP27B1	0.798242	1.64549	1.04362	6.9587e-32	8.62749e-31
DDN	2.95341	1.39584	-1.08125	9.74906e-24	5.62508e-23
DLGAP5	0.834552	1.8789	1.17082	1.08311e-42	5.31304e-41
DMRTA2	0.799936	1.78158	1.1552	1.07082e-19	4.53792e-19
ELF4	0.771055	1.54366	1.00145	2.63317e-49	3.54318e-47
EMR2	0.732305	1.51745	1.05113	9.01511e-44	5.07572e-42
EMX1	1.5446	0.619929	-1.31706	8.14862e-17	2.8062e-16
EN1	0.842542	1.98125	1.23359	8.31216e-26	5.7752e-25
ENPEP	0.726864	1.68845	1.21594	3.01066e-46	2.46689e-44
EPHA10	1.63866	0.739214	-1.14845	4.50496e-37	9.93597e-36
ESM1	1.22528	2.75314	1.16796	5.14218e-32	6.46275e-31
FAM111B	0.776876	1.57423	1.01889	6.18521e-37	1.33606e-35
FAM163B	3.26001	1.57154	-1.0527	1.07824e-24	6.71814e-24
FCGR2B	1.24866	2.68168	1.10275	2.38517e-31	2.8054e-30
FCGR2C	1.31148	3.0558	1.22036	3.81887e-44	2.26767e-42
GABRA1	1.85149	0.677914	-1.44952	2.20427e-21	1.06209e-20
GABRA5	1.98282	0.879626	-1.17259	1.42196e-18	5.5899e-18
GABRB2	1.40866	0.606593	-1.21552	4.79572e-16	1.55996e-15
GABRG1	1.57744	0.613881	-1.36155	1.22327e-28	1.1137e-27
GABRG2	2.24108	0.793501	-1.49789	3.58002e-30	3.78301e-29
GAD2	1.66338	0.803165	-1.05035	2.79614e-16	9.22426e-16
GALNT3	0.681402	1.36953	1.00711	3.89624e-32	4.97788e-31
GAS2L3	0.933643	2.00137	1.10005	9.3375e-51	2.01402e-48
GBP5	0.657274	1.43586	1.12735	1.57598e-34	2.55413e-33
GDF10	1.41275	0.618732	-1.19112	7.37728e-25	4.65788e-24
GJB6	1.73508	0.574564	-1.59446	1.49454e-20	6.79703e-20
GPR65	0.889641	1.98514	1.15795	3.85021e-49	4.95359e-47
GPX8	0.93681	2.31629	1.30599	6.8731e-46	5.25041e-44
GRIN1	5.02172	2.11337	-1.24863	4.24248e-38	1.05287e-36
GS1-72M22.1	1.35754	0.671008	-1.0166	4.38625e-22	2.23845e-21
HAS2	0.994235	2.08502	1.0684	8.2717e-41	3.07142e-39
HBQ1	2.1312	0.865322	-1.30036	3.4723e-23	1.93423e-22
HOXA10	0.687893	1.88858	1.45704	7.67988e-32	9.47357e-31
HOXA4	0.55247	1.56977	1.50658	3.70009e-23	2.05721e-22
HOXA5	0.550678	1.53382	1.47785	2.3932e-27	1.92651e-26
HOXA7	0.704839	1.8216	1.36984	1.63285e-20	7.40541e-20
HOXB2	0.999482	2.23099	1.15843	1.01211e-29	1.0266e-28
HOXB3	1.02125	2.28579	1.16236	1.02052e-23	5.87442e-23
HOXB7	0.76797	1.54568	1.00912	1.11558e-22	5.96073e-22
HOXC10	0.609935	1.57482	1.36846	6.34133e-21	2.95828e-20
HOXD10	0.542764	1.71964	1.66371	1.99331e-26	1.46693e-25
HOXD11	0.462496	1.56275	1.75658	9.40956e-25	5.88529e-24
HOXD9	0.99203	2.21949	1.16177	4.04001e-24	2.3922e-23
HRH3	2.42177	0.685376	-1.82109	3.61943e-46	2.91682e-44
HS3ST4	1.3649	0.667657	-1.03162	4.45263e-16	1.44997e-15
HSPA7	1.63093	3.41109	1.06454	4.0094e-38	1.0001e-36
IBSP	0.543034	2.11649	1.96256	8.10653e-37	1.72567e-35
IGF2BP2	0.765515	1.95931	1.35584	8.37752e-39	2.28814e-37
IGF2BP3	0.80401	2.16551	1.42942	5.80038e-46	4.50128e-44
IGJ	0.727714	1.56357	1.1034	3.32585e-14	9.49585e-14
IL1RN	0.732852	1.57321	1.10212	5.02027e-21	2.36263e-20
IL6	0.6283	1.64685	1.39018	2.33877e-27	1.88476e-26
IL8	1.13695	2.54625	1.1632	5.34269e-18	2.01081e-17
IQSEC3	2.86284	1.30407	-1.13442	3.02081e-32	3.88993e-31
ITGA4	0.795614	1.63904	1.04271	1.66345e-40	5.96525e-39
KCNA1	1.58771	0.727573	-1.12578	2.51866e-16	8.32759e-16
KCNC2	1.9934	0.686042	-1.53886	2.98623e-32	3.85216e-31
KCNK3	1.83625	0.906867	-1.0178	2.11493e-29	2.08186e-28
KCNK4	1.84575	0.807834	-1.19208	2.19539e-31	2.59257e-30
KCNT1	2.10615	0.892436	-1.23879	6.93095e-29	6.46669e-28
KCTD4	1.79419	0.852927	-1.07284	1.10357e-25	7.56003e-25
KDELR3	0.864936	1.8199	1.07319	1.01213e-39	3.20625e-38
KIAA1644	1.80564	0.763151	-1.24247	2.89292e-29	2.80997e-28
KYNU	0.733233	1.5726	1.1008	5.40551e-45	3.65358e-43
LIF	0.851561	2.1531	1.33823	3.68418e-38	9.2686e-37
LOX	1.00085	2.34735	1.22982	8.99638e-40	2.86225e-38
LRTM2	1.64772	0.630361	-1.38622	1.12586e-27	9.35578e-27
LTF	2.1302	4.43848	1.05907	8.282e-23	4.48733e-22
MAL2	1.56429	0.595012	-1.39452	9.52928e-20	4.05825e-19
44989	1.57719	0.7297	-1.11198	7.883e-26	5.49786e-25
MELK	1.23355	2.49472	1.01606	1.06702e-43	5.92802e-42
MEOX2	0.507805	1.58569	1.64276	4.79197e-15	1.44379e-14
MIR7-3HG	2.2068	1.0567	-1.06239	4.71622e-21	2.22278e-20
MMP9	1.56727	3.69425	1.23703	3.07613e-30	3.27413e-29
MPPED1	2.06236	0.932786	-1.14468	4.9721e-18	1.87808e-17
MXRA5	0.66492	1.7162	1.36797	3.02684e-45	2.13436e-43
MYT1L	2.40636	1.06151	-1.18074	6.21122e-29	5.81365e-28
NAMPTL	0.719766	1.84213	1.35578	8.66988e-46	6.5547e-44
NEUROD2	1.7334	0.801467	-1.11289	1.8195e-14	5.26258e-14
PACSIN1	3.20596	1.43143	-1.1633	6.27638e-25	3.9846e-24
PI3	0.767064	2.17136	1.50118	2.30447e-15	7.12114e-15
PLA2G2A	0.863957	2.93202	1.76287	1.56555e-28	1.40957e-27
PLEK2	0.705983	1.52222	1.10848	6.82563e-35	1.16409e-33
POSTN	1.03425	3.2371	1.64612	3.31698e-30	3.51773e-29
PRKCG	2.01674	0.763753	-1.40085	1.71915e-27	1.40707e-26
PRMT8	1.62459	0.733336	-1.14753	4.87831e-22	2.47407e-21
PTPRT	1.58497	0.738114	-1.10254	4.60116e-28	3.98143e-27
PTX3	1.19364	3.03631	1.34695	1.24183e-45	9.10694e-44
PVALB	2.40892	0.966741	-1.31719	1.7769e-18	6.9295e-18
RAB42	0.954382	2.10853	1.1436	2.5192e-50	5.06152e-48
RASAL1	2.49486	1.1791	-1.08127	4.21996e-22	2.15659e-21
RBFOX3	2.86807	1.37795	-1.05756	4.62286e-26	3.29944e-25
RP11-1263C18.1	1.54154	0.615758	-1.32394	5.17644e-24	3.04178e-23
RP11-192H23.5	2.88755	1.05269	-1.45577	2.60391e-18	1.00372e-17
RP11-1C8.7	1.90726	0.806244	-1.24221	5.40458e-21	2.53742e-20
RP11-21A7A.4	1.53929	0.656756	-1.22883	9.72075e-27	7.40645e-26
RP11-227B21.2	2.18017	0.704753	-1.62925	1.39388e-32	1.85855e-31
RP11-268P4.5	1.43266	0.688989	-1.05614	7.30386e-18	2.71962e-17
RP11-290F20.3	0.738058	1.48244	1.00617	4.9639e-17	1.73388e-16
RP11-307B6.3	2.38466	0.943984	-1.33695	3.49733e-21	1.6595e-20
RP11-357K6.1	1.79048	0.79726	-1.16723	7.55752e-23	4.10389e-22
RP11-524D16__A.3	0.558417	1.45607	1.38266	2.96626e-34	4.68816e-33
RP11-806H10.4	0.753747	1.53389	1.02504	1.75167e-25	1.18014e-24
RP5-1119A7.17	2.38076	0.714494	-1.73643	6.2089e-39	1.72473e-37
RTBDN	1.76776	0.745419	-1.24579	3.65988e-22	1.87887e-21
RTN4RL1	1.40798	0.592024	-1.2499	7.8099e-19	3.12801e-18
SAA1	0.982015	2.72952	1.47483	3.94365e-18	1.49848e-17
SAA2	0.565223	1.86602	1.72307	4.95145e-22	2.50943e-21
SCRT1	2.81972	1.24742	-1.1766	3.3767e-34	5.31058e-33
SERPINA5	0.760988	1.64082	1.10847	3.86177e-31	4.45637e-30
SGOL1	0.836309	1.67846	1.00503	2.28402e-36	4.60794e-35
SHOX2	0.59173	1.69835	1.52113	5.21633e-31	5.95392e-30
SKA1	0.786109	1.58131	1.00832	1.99365e-38	5.17539e-37
SLC1A6	2.28233	1.03143	-1.14586	1.70436e-31	2.034e-30
SLC26A4-AS1	1.74194	0.654216	-1.41286	5.01785e-20	2.18194e-19
SLC30A3	1.84412	0.890445	-1.05033	8.4431e-13	2.18635e-12
SLC32A1	1.78322	0.750869	-1.24785	8.65375e-19	3.45467e-18
SLC6A17	2.10776	0.993602	-1.08497	4.06443e-20	1.78162e-19
SLC8A2	2.50746	1.17696	-1.09116	5.54427e-33	7.63548e-32
SNAI1	0.701484	1.41943	1.01683	1.06219e-30	1.17578e-29
SOHLH1	1.65132	0.496339	-1.73423	1.54046e-23	8.75056e-23
SRPX2	1.28006	2.84783	1.15365	1.9438e-42	9.22643e-41
ST8SIA3	3.47099	1.57689	-1.13827	2.59084e-31	3.03513e-30
STC1	0.586177	1.6596	1.50143	3.9622e-38	9.9001e-37
SV2B	1.7678	0.844795	-1.06528	4.5787e-15	1.38323e-14
SVOP	2.93939	1.07782	-1.4474	3.71351e-38	9.32637e-37
SYN2	3.16973	1.49975	-1.07964	1.09551e-26	8.30377e-26
SYNPR	2.11207	0.964405	-1.13094	1.98695e-15	6.17428e-15
SYT13	2.24201	1.01613	-1.1417	1.29044e-23	7.37028e-23
TBR1	1.41743	0.663064	-1.09606	7.27629e-12	1.76487e-11
TDO2	0.677819	1.46376	1.11071	1.228e-24	7.61246e-24
THBD	0.938193	1.96147	1.06398	1.25517e-35	2.32445e-34
TMEM155	1.48835	0.662634	-1.16743	1.9883e-10	4.3748e-10
TNFAIP6	1.03546	2.38651	1.20463	6.02955e-39	1.68448e-37
TNFRSF11B	0.715205	1.59373	1.15598	2.30632e-35	4.14544e-34
TNNT1	3.49643	1.64948	-1.08387	1.57299e-31	1.88798e-30
TNNT2	1.9662	0.690739	-1.5092	7.69298e-19	3.08203e-18
TRDC	0.665922	1.81844	1.44928	2.27561e-33	3.23728e-32
TREM1	1.19602	2.72283	1.18686	1.66381e-31	1.98722e-30
TRIM67	1.5646	0.649472	-1.26846	1.11523e-21	5.50001e-21
TTK	0.865377	1.75923	1.02354	2.38224e-36	4.79292e-35
VSTM2A	2.75126	1.32356	-1.05567	1.00984e-24	6.30535e-24
WNT10B	1.49554	0.692532	-1.11072	1.46958e-16	4.95615e-16
WNT7B	2.47291	1.11828	-1.14493	2.57937e-35	4.59122e-34
WSCD2	1.52306	0.550323	-1.46862	1.30149e-35	2.40718e-34
