# Supplementary material for: Integrative analyses reveal biological function and prognostic role of m7G methylation regulators in high-grade glioma
Source: Aging (Albany NY). 2023 Sep 6;15(17):8782–99. doi: 10.18632/aging.204999 (PMC10522370; doi:10.18632/aging.204999)
Supplement: Supplementary Table 4 [file aging-15-204999-s003.xlsx]

## Sheet: Supplementary Table 4
Supplementary Table 4. Results of drug sensitivity based on 13 prognostic signature genes.
Gene	Drug	cor	pvalue
CYFIP1	Bendamustine	-0.60794	2.58201e-07
CYFIP1	XK-469	-0.583257	1.00598e-06
CYFIP1	Etoposide	-0.577154	1.38427e-06
CYFIP1	Teniposide	-0.541733	7.82129e-06
CYFIP1	Valrubicin	-0.521742	1.91156e-05
DCP2	Nelarabine	0.513898	2.67353e-05
CYFIP1	Epirubicin	-0.511839	2.91565e-05
CYFIP1	Carmustine	-0.501584	4.45347e-05
CYFIP1	BN-2629	-0.50141	4.48508e-05
CYFIP1	Imexon	-0.487598	7.76811e-05
CYFIP1	Pipobroman	-0.475902	0.000121469
CYFIP1	Melphalan	-0.473506	0.000132857
CYFIP1	Mitoxantrone	-0.47132	0.000144096
METTL1	5-fluoro deoxy uridine 10mer	0.459124	0.000224417
WDR4	Cladribine	0.453217	0.000276494
CYFIP1	Uracil mustard	-0.450047	0.000308776
CYFIP1	Thiotepa	-0.443449	0.000387254
CYFIP1	Hydroxyurea	-0.442886	0.000394715
DCP2	Curcumin	0.439992	0.000435243
WDR4	Thiotepa	0.437454	0.000473847
CYFIP1	Daunorubicin	-0.437374	0.000475116
CYFIP1	Chlorambucil	-0.437216	0.000477621
WDR4	Hydroxyurea	0.435662	0.000502952
IFIT5	Panobinostat	-0.435536	0.000505064
WDR4	Chlorambucil	0.43251	0.000558125
LSM1	Fenretinide	0.42983	0.000609274
LSM1	Chelerythrine	0.427429	0.000658673
CYFIP1	Asparaginase	-0.427165	0.000664316
CYFIP1	Triethylenemelamine	-0.426078	0.000688024
DCP2	Chelerythrine	0.424908	0.000714416
WDR4	Triethylenemelamine	0.424626	0.000720898
WDR4	Asparaginase	0.419124	0.000858771
WDR4	Uracil mustard	0.418692	0.000870548
CYFIP1	LMP-400	-0.41854	0.000874719
DCP2	Fenretinide	0.41446	0.00099381
WDR4	Vorinostat	0.412389	0.00105969
WDR4	Raltitrexed	0.409531	0.00115705
CYFIP1	kahalide f	0.409098	0.00117248
NCBP1	Chelerythrine	0.406681	0.00126209
WDR4	Cytarabine	0.401076	0.00149397
METTL1	Hydroxyurea	0.401026	0.00149623
WDR4	Acrichine	0.399199	0.00157979
DCP2	Raloxifene	0.395844	0.00174425
WDR4	Fludarabine	0.395356	0.0017694
METTL1	Cladribine	0.395139	0.00178068
DCP2	Fulvestrant	0.394724	0.00180246
LSM1	Nelarabine	0.393295	0.00187926
CYFIP1	Doxorubicin	-0.391471	0.00198147
WDR4	kahalide f	-0.390634	0.00203008
EIF4E1B	Fulvestrant	0.388177	0.00217886
WDR4	Cyclophosphamide	0.381744	0.00261552
CYFIP1	Oxaliplatin	-0.381504	0.00263317
EIF4A1	Cladribine	0.380169	0.00273361
WDR4	Cisplatin	0.378444	0.00286843
CYFIP1	Batracylin	-0.378086	0.00289713
CYFIP1	Lomustine	-0.374416	0.00320645
WDR4	Gemcitabine	0.373812	0.00326
CYFIP1	Idarubicin	-0.373281	0.00330788
CYFIP1	Paclitaxel	-0.372054	0.0034207
WDR4	Chelerythrine	0.371926	0.00343263
CYFIP1	Entinostat	-0.370033	0.00361396
CYFIP1	Ifosfamide	-0.369079	0.00370851
WDR4	Pipobroman	0.367537	0.00386592
CYFIP1	Irinotecan	-0.366102	0.00401777
CYFIP1	Imatinib	-0.366071	0.00402114
NCBP1	Nelarabine	0.365413	0.00409259
CYFIP1	Cyclophosphamide	-0.364973	0.0041409
DCP2	Arsenic trioxide	0.364846	0.004155
METTL1	8-Chloro-adenosine	0.36464	0.00417787
GEMIN5	Allopurinol	0.364314	0.00421433
METTL1	Chlorambucil	0.363144	0.00434749
WDR4	Irinotecan	0.362936	0.00437153
CYFIP1	Raltitrexed	-0.362561	0.00441517
CYFIP1	Eribulin mesilate	-0.360389	0.00467572
DCP2	SR16157	0.360034	0.00471962
WDR4	LMP-400	0.358669	0.00489167
CYFIP1	Fenretinide	-0.358509	0.00491215
NCBP1	PX-316	0.358322	0.00493623
CYFIP1	Carboplatin	-0.357378	0.00505938
EIF4G3	AFP464	-0.355366	0.00533096
METTL1	Vorinostat	0.352399	0.00575472
EIF4A1	Cytarabine	0.351102	0.00594905
EIF4A1	AP-26113	-0.351043	0.00595805
METTL1	Parthenolide	0.349975	0.00612263
METTL1	Gemcitabine	0.348595	0.0063411
METTL1	Uracil mustard	0.348274	0.00639293
EIF4A1	Gemcitabine	0.347281	0.00655558
WDR4	Clofarabine	0.346892	0.00662028
WDR4	Melphalan	0.346051	0.00676194
CYFIP1	7-Hydroxystaurosporine	-0.345013	0.00694062
WDR4	6-Mercaptopurine	0.343773	0.00715936
WDR4	Imexon	0.343616	0.00718746
CYFIP1	Irofulven	0.342447	0.0074
METTL1	Triethylenemelamine	0.342032	0.00747661
EIF4G3	Entinostat	-0.340975	0.00767525
CYFIP1	Nelfinavir	-0.340806	0.00770748
EIF4A1	Clofarabine	0.34045	0.00777562
CYFIP1	Estramustine	-0.33973	0.00791498
LSM1	Hydroxyurea	0.338499	0.00815856
CYFIP1	Elliptinium Acetate	-0.337414	0.00837852
NCBP1	Fenretinide	0.33608	0.00865606
WDR4	Ifosfamide	0.334361	0.00902553
WDR4	Dimethylaminoparthenolide	0.334335	0.00903116
DCP2	tfdu	0.331671	0.00963115
WDR4	Pemetrexed	0.330538	0.00989662
WDR4	Nelarabine	0.329243	0.0102077
EIF4A1	5-fluoro deoxy uridine 10mer	0.328942	0.0102812
CYFIP1	Nitrogen mustard	-0.32881	0.0103137
METTL1	tfdu	0.328739	0.0103312
CYFIP1	Docetaxel	-0.328616	0.0103614
CYFIP1	Vinorelbine	-0.328195	0.0104657
IFIT5	Tamoxifen	-0.327728	0.0105826
CYFIP1	Arsenic trioxide	-0.327631	0.0106069
CYFIP1	Vinblastine	-0.326535	0.010886
WDR4	Imatinib	0.326092	0.0110005
DCP2	Dimethylaminoparthenolide	0.32432	0.0114692
EIF4A1	Nelarabine	0.323954	0.0115683
WDR4	3-Bromopyruvate (acid)	0.322443	0.0119848
METTL1	Fludarabine	0.3218	0.0121657
DCP2	Cyclophosphamide	0.32126	0.0123197
CYFIP1	LDK-378	-0.320474	0.0125466
METTL1	Melphalan	0.319124	0.0129449
NCBP1	AT-13387	0.317631	0.0133979
METTL1	Thiotepa	0.317406	0.0134675
METTL1	Cytarabine	0.317345	0.0134863
WDR4	Digoxin	0.31611	0.0138734
LSM1	Cobimetinib (isomer 1)	-0.31553	0.0140588
EIF4A1	tfdu	0.315236	0.0141533
DCP2	Staurosporine	-0.314235	0.0144798
EIF4G3	Palbociclib	-0.313443	0.0147426
EIF4E1B	Entinostat	0.3128	0.0149588
CYFIP1	Actinomycin D	-0.311187	0.0155138
METTL1	Paclitaxel	-0.31045	0.015773
CYFIP1	Carfilzomib	-0.310212	0.0158575
METTL1	Vinorelbine	-0.309357	0.0161643
CYFIP1	Crizotinib	-0.30921	0.0162176
WDR4	Triapine	0.309152	0.0162386
WDR4	Dacarbazine	0.308368	0.0165256
DCP2	8-Chloro-adenosine	0.308315	0.016545
LSM1	Ifosfamide	0.307286	0.0169288
EIF4A1	Alectinib	-0.306581	0.0171957
CYFIP1	Ixabepilone	-0.30602	0.0174109
CYFIP1	Pipamperone	-0.30509	0.0177728
CYFIP1	Dromostanolone Propionate	-0.304991	0.0178117
METTL1	okadaic acid	-0.304921	0.017839
WDR4	8-Chloro-adenosine	0.304792	0.0178899
CYFIP1	Cytarabine	-0.304726	0.0179162
WDR4	tfdu	0.304619	0.0179583
CYFIP1	Denileukin Diftitox Ontak	-0.303351	0.0184662
WDR4	Carboplatin	0.300886	0.0194889
WDR4	Carmustine	0.30053	0.0196408
METTL1	Digoxin	0.299936	0.0198957
EIF4A1	Methotrexate	0.299358	0.0201468
NCBP1	8-Chloro-adenosine	0.297849	0.0208148
LSM1	Asparaginase	0.295679	0.0218086
DCP2	Pemetrexed	0.294117	0.0225485
CYFIP1	Cisplatin	-0.293629	0.0227838
EIF4G3	Aminoflavone	-0.293477	0.0228576
CYFIP1	Dimethylaminoparthenolide	-0.292994	0.0230931
NCBP1	Allopurinol	0.292757	0.0232096
WDR4	Methotrexate	0.292468	0.0233522
CYFIP1	Trametinib	0.292025	0.0235724
WDR4	Mithramycin	-0.291769	0.0237002
METTL1	kahalide f	-0.29127	0.0239516
CYFIP1	Afatinib	0.291265	0.0239538
LSM1	Trametinib	-0.290905	0.0241367
GEMIN5	kahalide f	-0.290826	0.0241768
NUDT11	Ethinyl estradiol	0.290449	0.0243693
METTL1	Raltitrexed	0.290235	0.0244795
EIF4G3	Elesclomol	-0.289951	0.024626
GEMIN5	Cladribine	0.289781	0.0247143
CYFIP1	Depsipeptide	-0.289728	0.0247418
WDR4	LMP776	0.289646	0.0247844
WDR4	Topotecan	0.289536	0.0248417
CYFIP1	Dexrazoxane	-0.288983	0.0251313
EIF4G3	Lificguat	-0.287988	0.0256597
DCP2	AFP464	0.287628	0.0258532
EIF4A1	Pemetrexed	0.287612	0.0258621
NUDT11	Hydrastinine HCl	0.286168	0.0266505
EIF4E1B	AFP464	0.286145	0.0266631
EIF4A1	Floxuridine	0.286051	0.0267153
WDR4	Pelitrexol	0.285162	0.0272116
WDR4	Nilotinib	0.28496	0.0273255
CYFIP1	LMP776	-0.284875	0.0273739
METTL1	LMP-400	0.284846	0.0273904
METTL1	Nitrogen mustard	0.284784	0.0274253
WDR4	Allopurinol	0.284595	0.0275327
DCP2	Lomustine	0.284489	0.0275929
DCP2	Pyrazoloacridine	0.282682	0.028638
DCP2	Ifosfamide	0.282525	0.0287304
EIF4A1	Fludarabine	0.282476	0.0287594
METTL1	Karenitecin	0.281571	0.029297
METTL1	Allopurinol	0.281299	0.0294606
WDR4	Lomustine	0.281065	0.0296016
METTL1	RH1	0.280716	0.0298129
CYFIP1	Homoharringtonine	-0.28055	0.029914
WDR4	7-Ethyl-10-hydroxycamptothecin	0.280148	0.0301601
WDR4	Karenitecin	0.279783	0.0303845
LSM1	Batracylin	0.278131	0.031419
METTL1	7-Ethyl-10-hydroxycamptothecin	0.277395	0.0318894
CYFIP1	Triapine	-0.277314	0.0319412
METTL1	Triapine	0.27727	0.0319699
DCP2	Oxaliplatin	0.276884	0.0322188
IFIT5	geldanamycin analog	-0.276621	0.0323903
LSM1	Selumetinib	-0.275903	0.0328603
DCP2	XK-469	0.275752	0.0329602
DCP2	Erlotinib	-0.2757	0.0329941
METTL1	Pemetrexed	0.275623	0.0330457
METTL1	Bleomycin	0.275006	0.0334559
METTL1	Fenretinide	0.274575	0.0337454
METTL1	XL-147	0.274306	0.0339271
LSM1	Tanespimycin	-0.274279	0.0339451
LSM1	Uracil mustard	0.27406	0.0340938
METTL1	Nelarabine	0.27324	0.0346551
EIF4A1	Celecoxib	-0.273217	0.0346714
NUDT11	Nelfinavir	0.272667	0.0350519
GEMIN5	8-Chloro-adenosine	0.272496	0.0351707
LSM1	Chlorambucil	0.27229	0.0353149
CYFIP1	Pemetrexed	-0.271375	0.0359601
CYFIP1	Topotecan	-0.271254	0.0360464
METTL1	Irinotecan	0.271204	0.0360818
NCBP1	Elliptinium Acetate	-0.27115	0.0361206
IFIT5	Tanespimycin	-0.270668	0.0364656
WDR4	Depsipeptide	-0.27004	0.0369193
EIF4A1	AT-13387	0.269946	0.0369875
NCBP1	Dimethylaminoparthenolide	0.269235	0.0375075
LSM1	kahalide f	-0.268724	0.0378852
CYFIP1	tfdu	-0.268666	0.037928
EIF4E1B	SR16157	0.268458	0.038083
DCP2	PX-316	0.267959	0.0384564
DCP2	Daunorubicin	0.267921	0.0384845
METTL1	Cisplatin	0.26751	0.0387946
IFIT5	AFP464	-0.266591	0.0394954
DCP2	Cordycepin	0.266509	0.0395581
LSM1	Fludarabine	0.265068	0.0406791
NCBP1	6-Mercaptopurine	0.263952	0.0415646
METTL1	Carboplatin	0.263632	0.0418218
WDR4	Curcumin	0.263592	0.0418544
DCP2	Vorinostat	0.262881	0.0424299
GEMIN5	Fenretinide	0.261895	0.0432401
METTL1	Dolastatin 10	-0.26186	0.0432688
CYFIP1	Isotretinoin	-0.261798	0.0433199
WDR4	LY-294002	-0.261654	0.0434396
IFIT5	Tyrothricin	-0.261075	0.043923
CYFIP1	Chelerythrine	-0.260828	0.04413
WDR4	Fostamatinib	0.26008	0.0447632
WDR4	RH1	0.259751	0.0450438
LSM1	Imexon	0.259553	0.0452137
NCBP1	Amonafide	0.259071	0.0456293
DCP2	Cytarabine	0.259059	0.0456389
METTL1	Depsipeptide	-0.258733	0.0459218
EIF4E1B	Sunitinib	-0.257788	0.0467499
EIF4G3	Denileukin Diftitox Ontak	-0.257781	0.0467562
NCBP1	LY-294002	-0.257318	0.0471658
CYFIP1	Dolastatin 10	-0.256832	0.047599
LSM1	XK-469	0.256596	0.0478112
LSM1	LMP-400	0.255892	0.0484469
CYFIP1	6-Mercaptopurine	-0.255575	0.0487357
DCP2	Chlorambucil	0.254836	0.0494142
GEMIN5	Pemetrexed	0.254556	0.0496731
